# Supplementary material for: Retrospective DVH analysis of point A based intracavitary brachytherapy for uterine cervical cancer
Source: PubMed Central journal article supplement (PMC7246069; doi:10.1093/jrr/rrz099), 2020-02-01

Supplementary figure

$r = 0.853, P < 0.001$

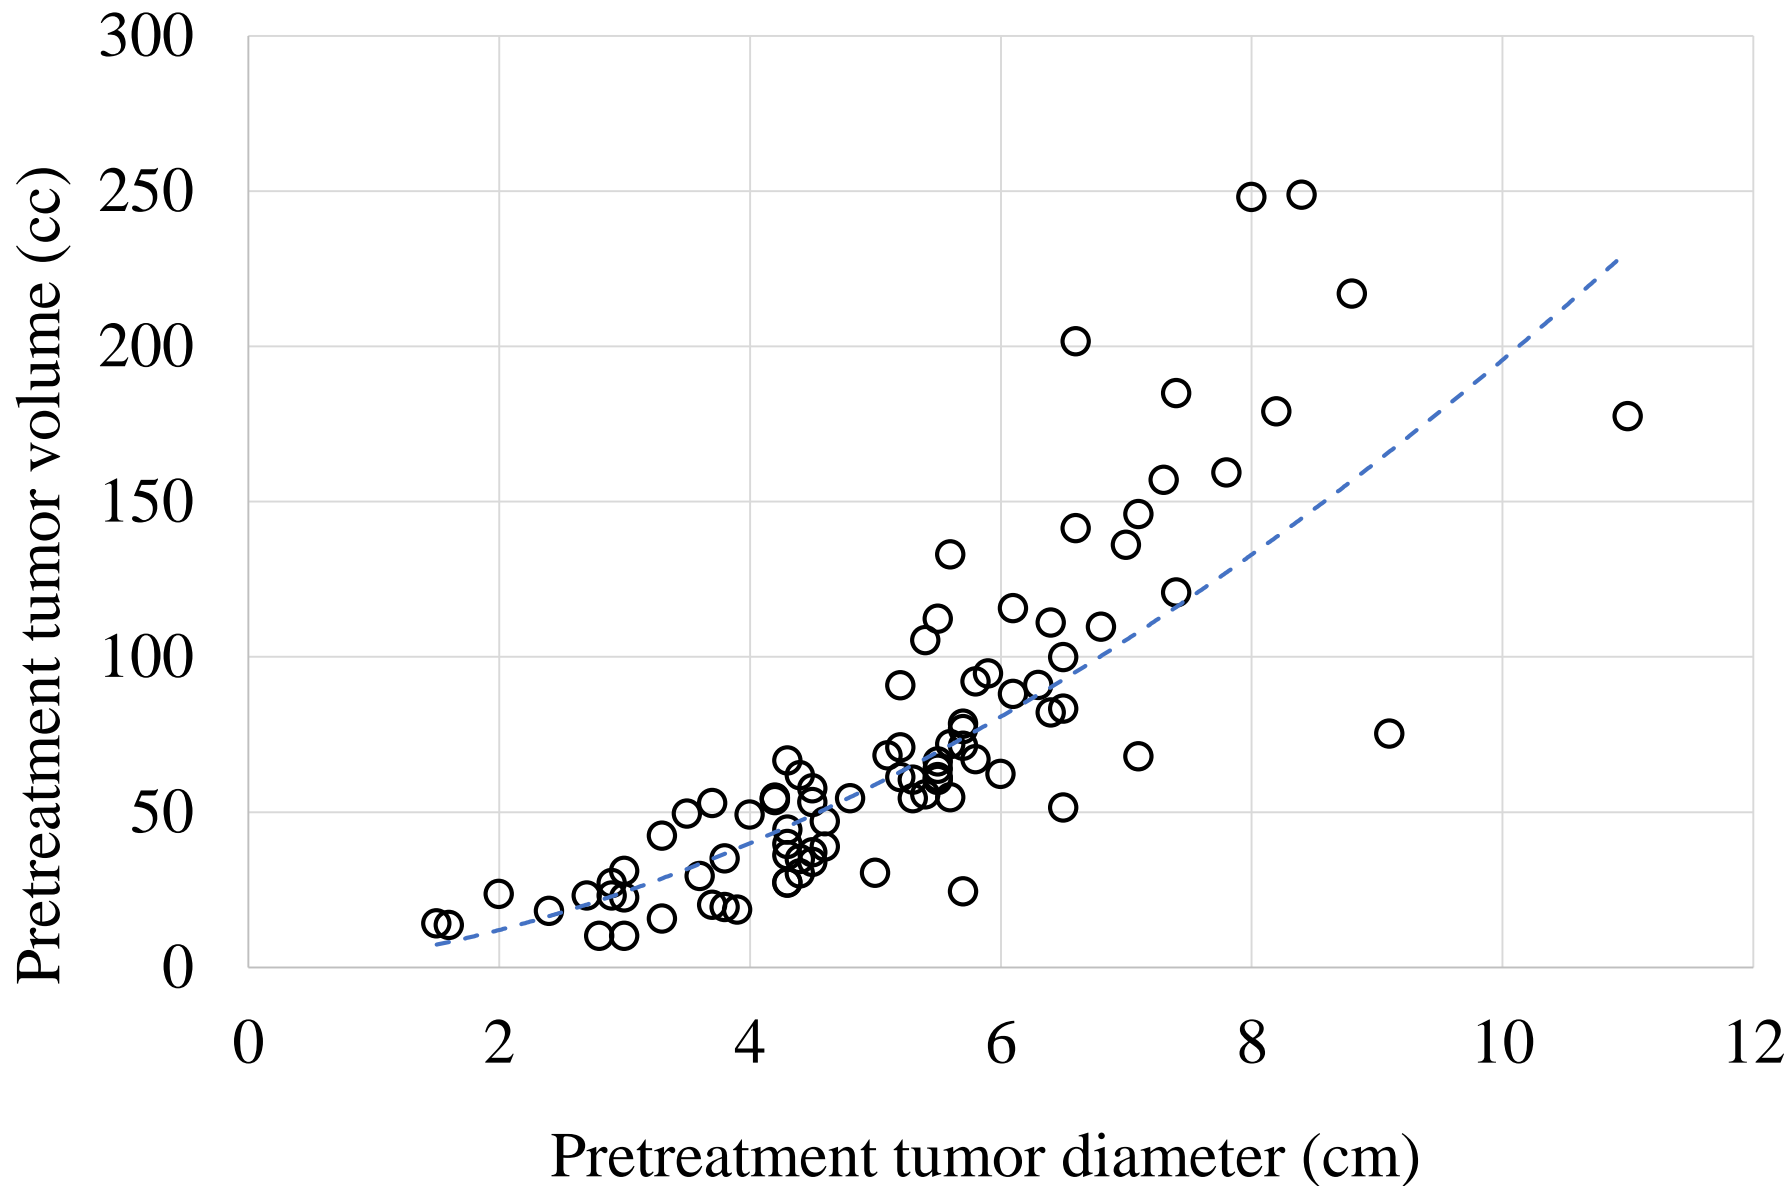

Supplement: supplementary_figure_rrz099.pdf [file supplementary_figure_rrz099.pdf]
